# Supplementary material for: The addition of molecular oxygen to hydroperoxy-propyl radicals
Source: Royal Society of Chemistry journal article supplement (doi:10.1039/b907649b), 1993-10-01
Supplement: b907649b.pdf [file b907649b.pdf]

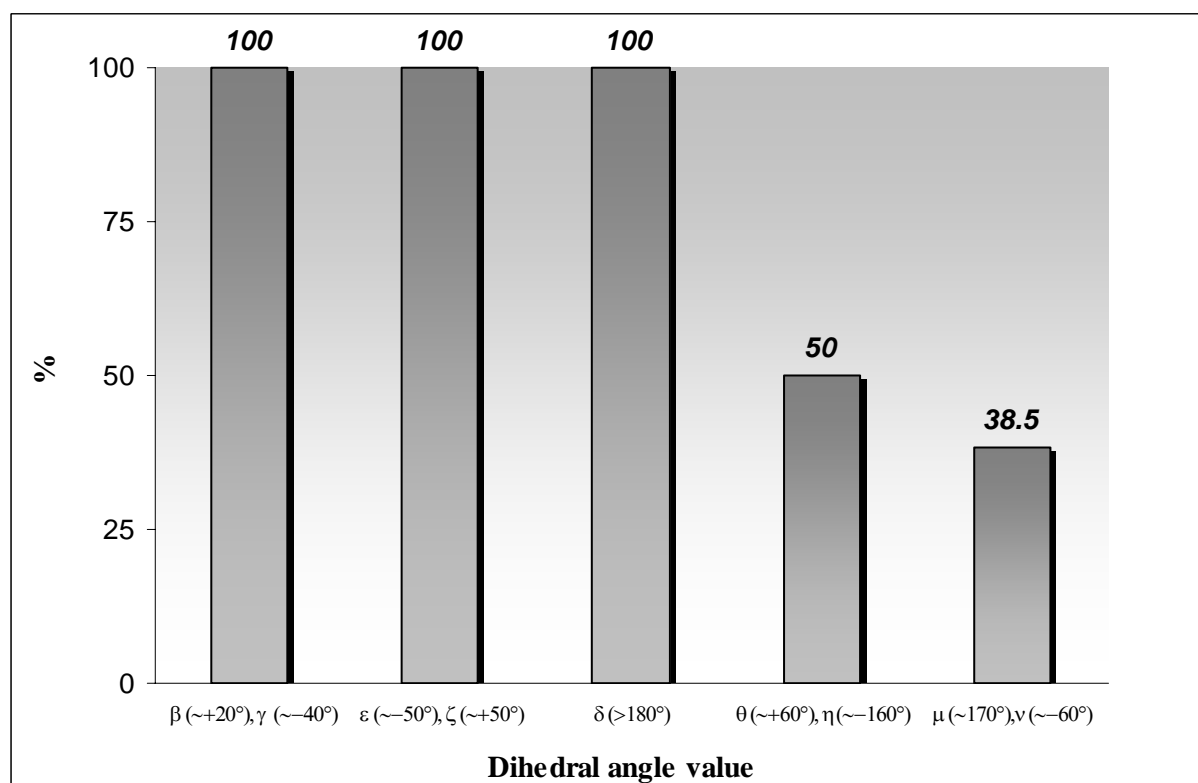

**Figure S1.** Rate of *4R19R* conformers, within 5 kcal/mol from the global minimum, assuming the indicated values of dihedral angles.
